# Supplementary material for: In Vitro Antiviral Activity of α-Mangostin against Dengue Virus Serotype-2 (DENV-2)
Source: MDPI journal article supplement (doi:10.3390/molecules26103016), 2021-05-19
Supplement: s1 [file s1]

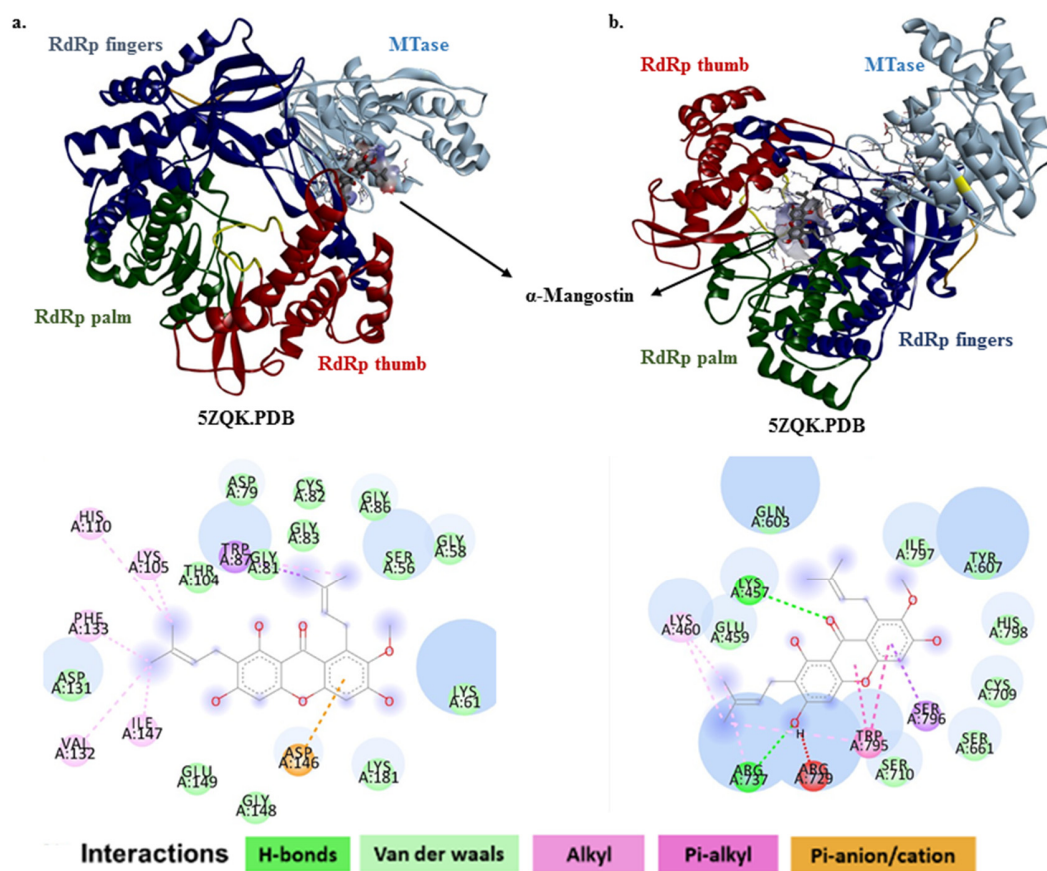

**Figure S1.** Molecular interactions of  $\alpha$ -Mangostin with DENV non-structural protein 5 (NS5) complex of methyltransferase (MTase) and RdRp (a) NS5 methyltransferase domain docking pose (b) NS5 RdRp domain docking pose.
